# Supplementary material for: A Potential Prognostic Gene Signature for Predicting Survival for Glioblastoma Patients
Source: Biomed Res Int. 2019 Mar 26;2019:9506461. doi: 10.1155/2019/9506461 (PMC6457303; doi:10.1155/2019/9506461)
Supplement: Supplementary Materials — Supplementary Table 1. The logFCp value and FDR of 393 DEGs between GBM and normal control samples. [file 9506461.f1.xls]

## Sheet: 1
Group	logFC	p.value	FDR
HOXA7	-6.00722	5.34e-14	1.97e-10
HOXD9	-5.91719	7.8e-13	7.82e-10
HOXD11	-5.73945	1.37e-10	3.71e-08
HOXC13	-5.42202	3.47e-09	4.57e-07
HOXA9	-5.09402	1.01e-07	7.86e-06
HAND2	-4.65641	5.37e-09	6.33e-07
NKX3-2	-4.64185	4.88e-08	4.15e-06
HOXC9	-4.57831	1.61e-08	1.61e-06
HOXD4	-4.39625	2.33e-08	2.16e-06
PRDM13	-4.36523	0.000467901	0.00934907
FAM183A	-4.26518	4.01e-06	0.000176127
HOXD8	-4.21785	6.63e-10	1.29e-07
EN1	-4.16673	2.54e-11	9.53e-09
TBX5	-4.10792	6.38e-07	3.63e-05
HOXC5	-3.97955	4.88e-08	4.15e-06
C6orf15	-3.95126	7.26e-08	5.87e-06
HOXA6	-3.85788	2.32e-07	1.59e-05
TLX1	-3.77022	1.9e-05	0.000623081
HOXA5	-3.73315	3.75e-13	5.48e-10
HOXD10	-3.71624	5.48e-13	7.29e-10
HIST1H3G	-3.71008	0.00163815	0.0260713
HOXD13	-3.5892	5.22e-12	3.05e-09
HIST1H2BH	-3.56824	5.3e-06	0.00022404
SIX6	-3.56621	5.21e-06	0.000221516
SPINK8	-3.52153	2.19e-07	1.52e-05
HOXA2	-3.46429	5.21e-11	1.73e-08
DPEP1	-3.45335	1.62e-10	4.23e-08
2017-09-14	-3.44099	0.000324976	0.00688855
BARHL1	-3.4357	1.67e-05	0.000561504
TERT	-3.29686	1.24e-05	0.000444516
HOXA11	-3.22846	2.47e-09	3.44e-07
HOXC8	-3.17142	5.2e-09	6.29e-07
C1orf158	-3.14469	2.13e-05	0.000683188
HOXC11	-3.14356	7.61e-09	8.5e-07
OTP	-2.81462	2.1e-07	1.48e-05
IRX5	-2.74127	4.03e-07	2.47e-05
GSX1	-2.63959	2.38e-05	0.000743695
PRG2	-2.40753	0.000493261	0.00970987
WDR38	-2.39753	4.5e-05	0.00129817
TMOD4	-2.18751	5.84e-05	0.00162697
PAX3	-2.163	7.18e-05	0.00195195
CLEC4F	-2.02143	0.00338808	0.0460111
C7orf57	-1.90679	4.69e-05	0.00134239
XKR5	-1.87627	0.001073	0.0185068
IRX1	-1.83977	2.86e-05	0.000873285
NR1H4	-1.4735	0.000359949	0.00167
ATP6V1B1	-1.46015	0.000201008	0.00462983
XIRP2	-1.16245	0.000406093	0.00181
DCAF4L2	-1.08403	0.0032995	0.00919
PRSS33	-1.0758	0.000993699	0.0036
PRSS54	-0.998426	0.0112762	0.0224
CASP12	-0.988152	0.013212	0.0249
RHBG	-0.987375	0.0062779	0.0147
FAM166A	-0.96772	0.0147075	0.0269
HIST1H2AL	-0.923717	0.0169151	0.0297
CER1	-0.905634	0.0125732	0.0241
PLAC1	-0.889674	0.00482731	0.0121
CCL27	-0.875856	0.0341071	0.0479
C5orf38	-0.871676	0.00193331	0.00599
GFI1B	-0.763056	0.0245133	0.0385
FEV	-0.752045	0.0131562	0.0248
ACE2	-0.749497	0.0223244	0.0359
DNAI2	-0.732914	0.0302533	0.0437
CA5A	-0.732628	0.0105623	0.0217
DNAJB13	-0.72687	0.0114893	0.0226
SNX31	-0.72003	0.00102775	0.00365
CPA2	-0.718675	0.00854663	0.0186
CCL25	-0.714515	0.0196088	0.0327
SLC18A1	-0.70421	0.00859718	0.0187
HIST1H1B	-0.691357	0.0262573	0.0401
MAP3K15	-0.662975	0.031602	0.0452
RDM1	-0.660994	0.00423334	0.011
TRIM74	-0.636459	0.0246901	0.0386
VTCN1	-0.622452	0.0285108	0.0421
DLK1	-0.606693	0.010685	0.0217
GTF2A1L	-0.591718	0.0287855	0.0422
CNPY1	-0.586564	0.00410256	0.0107
SOST	0.587291	0.0196208	0.0327
DIO3	0.588811	0.0018751	0.00586
POU2AF1	0.589602	0.00228085	0.00689
PKP3	0.590328	0.0129308	0.0245
MS4A1	0.590607	0.0324923	0.0463
TMPRSS13	0.593202	0.0109136	0.022
MCTP2	0.597874	0.000326147	0.00154
DMKN	0.60221	0.000996735	0.0036
MMP10	0.607007	0.0142443	0.0262
MLPH	0.607285	0.000647379	0.0026
CCL7	0.607643	0.00525031	0.0129
LILRB5	0.61155	0.000496313	0.00213
C1orf87	0.616814	0.00130279	0.00439
NXNL2	0.616924	0.021972	0.0355
PRG4	0.618164	0.000782738	0.003
EHF	0.620028	0.00272375	0.00787
COL17A1	0.621077	0.00333281	0.00923
DMBT1	0.622084	0.00233951	0.007
KCNK17	0.622586	0.0223391	0.0359
SBSN	0.623182	0.00499458	0.0124
TUSC5	0.640554	0.013212	0.0249
NPPC	0.644686	0.0108713	0.0219
MICALCL	0.650483	0.00854105	0.0186
TFAP2C	0.652857	0.000374885	0.00172
CCL19	0.655794	0.00374859	0.0101
FLG	0.659067	0.00084995	0.00318
ITIH3	0.661127	0.00462308	0.0117
TCHH	0.667306	0.000675758	0.00269
SLC4A1	0.670722	0.0064886	0.0151
TMPRSS3	0.676937	9.73e-05	0.000613
PTGDR	0.683229	0.00689053	0.0157
INSL3	0.696309	0.011768	0.023
DLX3	0.6972	0.00332634	0.00923
MYOM3	0.70382	0.00905467	0.0193
GOLGA6B	0.72557	0.00757169	0.017
BDKRB1	0.725978	0.000864164	0.00321
DPT	0.730425	0.000341878	0.0016
IKZF3	0.73051	0.00813144	0.0179
FFAR3	0.746277	0.00379115	0.0102
PTGFR	0.780397	6.56e-06	7.68e-05
MEPE	0.918002	0.00114766	0.0195182
ENTPD3	0.947993	0.000118944	0.00303079
BSPRY	0.951926	0.00100155	0.0175015
CLCA2	0.98324	1.15e-05	0.000124
TAC1	0.983817	6.62e-05	0.00181933
PLCXD3	0.986144	1.67e-05	0.000561504
STAT4	1.01367	9.73e-05	0.00255955
FMN1	1.01724	0.00293541	0.0412424
PKP1	1.02476	0.000524398	0.0102401
RBP4	1.03059	1.48e-05	0.000511737
SLC24A2	1.03441	1.46e-05	0.000506018
KRT17	1.04893	0.000110993	0.00288345
WNT2	1.04945	0.000220656	0.00501965
GABRB2	1.07392	6.13e-07	3.55e-05
CRHBP	1.07659	8.48e-06	0.000326391
SLC6A15	1.07962	1.78e-06	8.68e-05
CDKL2	1.08111	8.88e-06	0.000336474
ADAMTS16	1.08131	0.000108724	0.00282953
KCNK12	1.08644	5.66e-05	0.00158588
ZFP57	1.09365	0.000345639	0.00725296
TMEM171	1.1009	0.00057169	0.0110165
LIPH	1.10948	0.00136577	0.022433
COL10A1	1.11337	0.000423757	0.00858431
SPHKAP	1.11539	2.63e-06	0.000124085
PGR	1.11739	0.000569727	0.0109932
SV2B	1.11924	4.46e-08	3.84e-06
ACVR1C	1.13303	3.07e-06	0.000139447
HS3ST4	1.13886	8.84e-07	4.77e-05
GREM2	1.14985	4.12e-06	0.000179343
RTN4RL1	1.15714	8.51e-07	4.68e-05
KRT86	1.15799	0.00279523	0.0397695
LRFN5	1.15803	1.54e-06	7.66e-05
C22orf31	1.1589	0.00333275	0.0455053
ZNF727	1.15999	0.0009626	0.0169219
TMEM233	1.162	2.29e-05	0.000726541
SYNPR	1.167	6.52e-08	5.33e-06
LYPD6B	1.1685	0.000396164	0.0081495
GABRG2	1.17	1.01e-07	7.86e-06
MYT1L	1.17013	3.27e-08	2.94e-06
SLC30A3	1.18131	2.07e-07	1.46e-05
GABRA4	1.18214	2.6e-07	1.72e-05
NEFM	1.1836	2.02e-08	1.93e-06
GUCA1A	1.18702	0.000121771	0.00308135
ADH1B	1.19297	0.000807857	0.0144508
CCL28	1.1955	0.00024004	0.0053356
CLVS2	1.19587	1.15e-05	0.000417367
MMP3	1.19724	0.000401645	0.00823907
KSR2	1.19782	2.77e-07	1.76e-05
THEMIS	1.20098	1.92e-05	0.000626829
RIMS2	1.20208	2.43e-07	1.65e-05
KCNJ1	1.20255	0.00024004	0.0053356
KCNK9	1.20363	5.71e-06	0.000237933
SELE	1.20577	0.00017025	0.00404233
CUX2	1.21073	2.48e-07	1.66e-05
KCNJ13	1.21369	0.00252634	0.0365844
MPP7	1.2197	3.64e-06	0.000160842
HSPB3	1.2231	4.45e-05	0.00129138
CBLN2	1.23348	4.79e-07	2.86e-05
RBM11	1.24374	6.87e-06	0.000274188
CREG2	1.24494	4.04e-08	3.54e-06
NRAP	1.24856	0.000104748	0.00273579
FLT3	1.24857	0.000608771	0.0115785
OLFM3	1.24881	3.57e-07	2.2e-05
PPP4R4	1.25204	1.03e-07	7.97e-06
PRSS16	1.25513	0.000195681	0.00454625
GRIN1	1.25612	5.1e-10	1.1e-07
CNNM1	1.2583	1.32e-07	1e-05
SFTPA2	1.25988	0.00261857	0.0377704
LPO	1.26181	0.000788168	0.0142158
GABRA1	1.26329	4.65e-09	5.75e-07
BTBD16	1.26416	0.000788168	0.0142158
KCNJ12	1.26423	1.02e-06	5.35e-05
MCF2	1.26481	2.31e-06	0.000109695
HTR2A	1.26692	1.73e-07	1.26e-05
OTOF	1.27391	4.05e-06	0.000177258
COL19A1	1.27407	3.33e-05	0.00100009
SCARA5	1.27489	8.29e-06	0.000320766
LRRC7	1.27736	1.61e-07	1.19e-05
SLC32A1	1.27826	2.17e-08	2.06e-06
SLC35F3	1.28022	7.98e-07	4.42e-05
CLCA4	1.28184	6.09e-06	0.000248805
CLEC2L	1.28186	2.51e-07	1.68e-05
WNT9A	1.28252	0.000737159	0.013494
CACNA1I	1.28323	5.13e-08	4.33e-06
GRIP2	1.28924	5.93e-06	0.000245006
FSTL4	1.2905	1.77e-07	1.28e-05
GRM7	1.29278	6.49e-07	3.66e-05
FEZF2	1.29401	1.04e-06	5.43e-05
HPSE2	1.29936	0.000267483	0.00587418
NELL1	1.3002	9.06e-08	7.16e-06
SVOP	1.3054	4.68e-09	5.75e-07
FABP6	1.31263	1.3e-05	0.0004615
CBLN1	1.31597	1.29e-06	6.53e-05
B3GNT4	1.31691	1.58e-06	7.83e-05
NGB	1.31761	1.21e-06	6.19e-05
FSTL5	1.32286	8.62e-08	6.89e-06
KLHL38	1.3246	0.00105431	0.018314
KCNT1	1.32627	9.41e-09	1.02e-06
DACH2	1.32788	1.62e-07	1.19e-05
RGS8	1.32856	0.000227378	0.00514008
PAX2	1.32952	0.000412193	0.00842002
CALY	1.33522	3.14e-09	4.25e-07
KCNJ3	1.3384	4.11e-08	3.58e-06
PGA3	1.33907	0.000225154	0.00509768
ATP2B3	1.34053	5.27e-09	6.32e-07
BHLHE22	1.34521	2.73e-07	1.75e-05
KCNC2	1.34565	3.29e-09	4.37e-07
INSM2	1.35054	1.7e-05	0.000563814
PVALB	1.35061	7.65e-06	0.000299559
GAD2	1.35329	1.93e-08	1.87e-06
BARX2	1.3535	3.73e-05	0.00110435
GRIP1	1.35679	8.76e-07	4.77e-05
MTUS2	1.35869	5.81e-08	4.8e-06
SLC17A6	1.36666	1.27e-07	9.67e-06
SIAH3	1.36751	9.56e-06	0.000360373
SST	1.37308	2.36e-09	3.32e-07
MYOCD	1.37325	0.000744086	0.0136038
RFPL2	1.37392	9.56e-06	0.000360373
F7	1.37438	3.57e-05	0.00106344
SH3RF2	1.37599	1.7e-05	0.000563814
RTL1	1.37936	2.35e-05	0.000737577
OPALIN	1.38185	5.94e-10	1.21e-07
CDH18	1.38208	2.33e-08	2.16e-06
CDKL5	1.38577	1.96e-07	1.41e-05
OR2W3	1.38809	1.24e-05	0.000444516
GABRA5	1.38983	3.32e-10	7.47e-08
MAL2	1.39053	1.38e-09	2.29e-07
VAX1	1.39153	8.64e-06	0.000331676
FAM19A4	1.39247	1.4e-05	0.000491041
GPR83	1.39474	3.59e-08	3.2e-06
HRNR	1.39546	0.00037538	0.00774373
WSCD2	1.40193	5.81e-09	6.74e-07
OXGR1	1.40309	0.000135664	0.00336309
HOOK1	1.40376	1.58e-08	1.6e-06
PRKCG	1.40386	1.28e-10	3.6e-08
TBR1	1.40585	7.52e-09	8.46e-07
NDST3	1.40603	2.13e-07	1.49e-05
WNT10B	1.41097	2.33e-08	2.16e-06
HRH3	1.41542	1.91e-09	2.85e-07
SLC1A6	1.42345	5.17e-08	4.33e-06
MPPED1	1.42396	1.58e-09	2.51e-07
SCUBE1	1.42407	2.4e-05	0.000743695
GJB6	1.42754	3.66e-09	4.78e-07
CACNA1B	1.43	7.37e-10	1.37e-07
CPLX3	1.43053	9.69e-09	1.04e-06
DLGAP2	1.44462	1.62e-09	2.55e-07
RASAL1	1.44549	3.22e-10	7.36e-08
CPNE9	1.44836	1.24e-08	1.29e-06
OR2L13	1.44913	2.25e-06	0.000107544
UNC13C	1.45031	4.3e-09	5.42e-07
SLC9A2	1.45103	1.35e-06	6.79e-05
LRTM2	1.46877	1.03e-09	1.77e-07
SSTR1	1.48776	1.43e-09	2.31e-07
BEND4	1.49023	2.76e-07	1.76e-05
HTR1B	1.49451	4.82e-05	0.00137422
TMC5	1.497	3.35e-05	0.00100404
HAS1	1.50333	4.18e-07	2.55e-05
CCKBR	1.50433	4.71e-10	1.03e-07
PABPC1L2B	1.51178	4.2e-09	5.34e-07
RSPO3	1.51193	2.61e-07	1.72e-05
GPR22	1.51663	3.96e-09	5.08e-07
RYR2	1.51981	2.06e-11	8.14e-09
ZNF831	1.52028	5.63e-08	4.68e-06
CDHR2	1.52354	1.25e-05	0.000445915
HCN1	1.53561	3.04e-10	7.06e-08
GPR61	1.53722	2.63e-08	2.4e-06
NRG4	1.54171	2.4e-05	0.000743695
VIP	1.54421	1.6e-08	1.61e-06
OPRK1	1.54504	1.91e-08	1.87e-06
WIF1	1.55002	1.15e-09	1.96e-07
CA7	1.55042	8.23e-08	6.61e-06
NPAS4	1.562	1.89e-07	1.36e-05
CACNG3	1.56203	5.31e-11	1.73e-08
BTBD8	1.5629	2.11e-05	0.000679755
NPY5R	1.57564	7.15e-07	4.02e-05
NT5C1A	1.58747	1.44e-05	0.000500272
KRT19	1.58886	3.41e-06	0.000152057
FAM163B	1.59247	1.87e-10	4.72e-08
EMX1	1.59489	3.79e-09	4.91e-07
NOS1	1.60561	9.01e-09	9.83e-07
SLC6A20	1.60868	1.21e-07	9.27e-06
TBC1D26	1.60963	2.92e-05	0.000889748
RS1	1.61374	1.36e-07	1.02e-05
EPN3	1.61735	2.06e-07	1.46e-05
TRPV6	1.61921	3.28e-08	2.94e-06
CACNA1F	1.62578	6.14e-07	3.55e-05
GPR21	1.62838	1.71e-06	8.36e-05
EGR4	1.62993	2.32e-08	2.16e-06
SERPIND1	1.63039	6.32e-07	3.61e-05
SLC7A4	1.63089	1.73e-09	2.69e-07
DRD1	1.63742	9.36e-10	1.65e-07
KCNS2	1.64155	5.43e-09	6.35e-07
IL12RB2	1.6444	1.49e-08	1.52e-06
GPRIN2	1.64498	1.22e-06	6.22e-05
FRMPD4	1.64523	7.52e-11	2.34e-08
C1QL3	1.64696	1.07e-11	5.4e-09
PRKG2	1.64872	3.28e-07	2.05e-05
FAM163A	1.65265	2.86e-06	0.000132375
PCDH11Y	1.65418	2.42e-07	1.65e-05
SP7	1.65925	1.03e-05	0.000386276
GRM4	1.66252	8.74e-10	1.58e-07
COL6A6	1.66847	1.79e-05	0.000590983
FRMPD2	1.6707	2.89e-07	1.83e-05
KRT81	1.6772	6.11e-06	0.000248927
GPR26	1.67777	2.35e-10	5.73e-08
TMEM132D	1.67798	1.21e-11	5.71e-09
RFPL1	1.67978	1.06e-05	0.000395499
PTGER3	1.68265	7.71e-10	1.41e-07
ALOXE3	1.68646	2.65e-07	1.73e-05
CYP26C1	1.69306	4.37e-05	0.00127831
HTR4	1.69367	3.44e-07	2.14e-05
KHDRBS2	1.69971	1.05e-08	1.11e-06
DOC2B	1.70193	7.92e-09	8.78e-07
KCNA4	1.71829	1.28e-09	2.15e-07
KCNH6	1.72299	2.79e-05	0.000855483
TYRP1	1.72959	6.4e-07	3.63e-05
ATP8A2	1.72998	4.85e-12	2.96e-09
MAGEC3	1.73107	7.9e-06	0.000308121
THEM5	1.74175	5.06e-06	0.000215765
SLC26A8	1.74431	1.05e-08	1.11e-06
SLC22A6	1.75075	1.89e-08	1.87e-06
CDH7	1.75932	4.18e-08	3.62e-06
CHRNA2	1.76924	8.5e-09	9.35e-07
KLHL34	1.77134	1.36e-07	1.02e-05
HTR5A	1.77513	9.24e-11	2.82e-08
CACNG2	1.77748	2.11e-09	3.09e-07
HIPK4	1.78501	7.05e-10	1.36e-07
TCERG1L	1.79887	7.4e-10	1.37e-07
KLK10	1.80583	1.31e-06	6.61e-05
SLC6A7	1.80659	1.24e-13	3.02e-10
PPIAL4C	1.80689	2.67e-07	1.73e-05
SLC27A2	1.81282	1.19e-08	1.24e-06
CDH12	1.81698	1.44e-09	2.31e-07
PRRG3	1.82291	1.06e-08	1.12e-06
LINGO2	1.84355	1.8e-09	2.77e-07
FAM153A	1.8563	6.52e-10	1.29e-07
TDRD5	1.85693	4.84e-07	2.88e-05
PAX7	1.85792	3.28e-09	4.37e-07
PNMA5	1.85921	6.8e-13	7.65e-10
MC4R	1.86352	6.89e-08	5.6e-06
TMEM215	1.88881	1.82e-09	2.77e-07
TRHDE	1.89224	8.02e-13	7.82e-10
EPHA8	1.89716	2.55e-09	3.49e-07
KCNG3	1.91941	2.51e-09	3.46e-07
CRH	1.92329	6.45e-10	1.29e-07
XKR7	1.94046	2.2e-09	3.19e-07
STYK1	1.94984	2.07e-12	1.58e-09
TRPC5	1.9598	3.42e-10	7.58e-08
C10orf82	1.9641	6.14e-08	5.05e-06
SDR16C5	1.96825	1.52e-10	4.04e-08
TMEM88B	1.97084	6.53e-09	7.46e-07
PABPC1L2A	1.98175	2.84e-10	6.7e-08
CLEC4G	1.98649	5.61e-10	1.16e-07
KCNV1	2.02106	4.98e-14	1.97e-10
FCER2	2.03106	1.33e-10	3.67e-08
ANKRD2	2.05008	4.47e-09	5.59e-07
CDH9	2.07343	2.6e-13	4.75e-10
SYCE1	2.08283	2.67e-12	1.86e-09
HBQ1	2.08693	5.54e-10	1.16e-07
CYP1A1	2.08724	1.96e-08	1.89e-06
GRIN2B	2.09883	4.77e-12	2.96e-09
HTR2C	2.10802	1.53e-13	3.2e-10
KCNB2	2.11604	1.89e-12	1.58e-09
GNG13	2.11902	4.65e-11	1.64e-08
OCA2	2.14646	2.79e-10	6.69e-08
SOHLH1	2.14661	6.27e-13	7.64e-10
KCNH5	2.15495	1.14e-10	3.27e-08
NEUROD6	2.15863	7.27e-16	1.06e-11
RXFP1	2.19333	6.74e-14	1.97e-10
SV2C	2.20835	5.98e-11	1.9e-08
CALHM1	2.22703	3.56e-12	2.37e-09
ANKRD34C	2.27262	1.53e-11	6.58e-09
EPHA6	2.31592	8.43e-12	4.4e-09
FBXO40	2.32605	1.46e-11	6.47e-09
GALNTL6	2.43187	3.32e-13	5.4e-10
SSTR3	2.48354	6.73e-14	1.97e-10
